# Supplementary material for: Chemical speciation, source apportionment, and pollution assessment of phosphorus in sediments from typical urban lakes in Southern China
Source: Research Square preprint supplement (doi:10.21203/rs.3.rs-7828473/v1), 2025-11-20
Supplement: Supplementary file 1 [file e5cf24c75eb067e4cbd9f916.docx]

**Supplementary Table 1** Median size of sediments (μm) and concentrations of grain size compositions (%), organic matter (%), and phosphorus speciation (mg/kg) in sediment profiles of the Xianghu Lake (XH1, XH2, and XH3), the Qianhu Lake (QH1, QH2, and QH3), and the Aixihu Lake (AXH1, AXH2, and AXH3) in Nanchang, China.

| Index | | Clay | Fine silt | Coarse silt | Sand | Median size | Organic matter | Total phosphorus | Ex-P | Fe-P | Ca-P | De-P | Org-P |
| --- | --- | --- | --- | --- | --- | --- | --- | --- | --- | --- | --- | --- | --- |
| XH1 | Minimum | 32.97 | 26.17 | 20.54 | 0.00 | 3.73 | 6.30 | 587.8 | 35 | 81.99 | 164.35 | 69.3 | 71.45 |
| Maximum | 51.70 | 29.54 | 39.69 | 0.00 | 6.61 | 15.01 | 1481.57 | 396.19 | 297.92 | 508.7 | 418.48 | 184.46 |
| Average | 44.09 | 27.53 | 28.38 | 0.00 | 4.68 | 10.70 | 902.54 | 147.27 | 173.42 | 298.74 | 176.8 | 106.3 |
| Std. | 5.60 | 0.75 | 5.63 | 0.00 | 0.81 | 2.10 | 212.67 | 123.63 | 62.98 | 93.13 | 86.23 | 217.98 |
| XH2 | Minimum | 32.27 | 25.64 | 23.20 | 0.00 | 3.99 | 3.76 | 538.79 | 53.79 | 79.45 | 207.54 | 68.44 | 52.94 |
| Maximum | 50.05 | 30.73 | 42.09 | 0.00 | 7.06 | 11.63 | 1170.85 | 234.57 | 285.44 | 504.87 | 413.29 | 290.91 |
| Average | 41.55 | 27.72 | 30.73 | 0.00 | 5.10 | 6.94 | 858.39 | 96.65 | 171.56 | 303.9 | 170.31 | 115.97 |
| Std. | 6.18 | 1.45 | 6.28 | 0.00 | 0.95 | 1.76 | 194.46 | 52.01 | 59.65 | 85.99 | 98.6 | 168.26 |
| XH3 | Minimum | 32.50 | 26.94 | 24.18 | 0.00 | 4.14 | 4.87 | 586.49 | 59.31 | 88.22 | 206.78 | 62.75 | 73.56 |
| Maximum | 48.24 | 30.88 | 38.53 | 0.00 | 6.74 | 10.84 | 1119.94 | 210.9 | 292.18 | 507.33 | 422 | 162.14 |
| Average | 39.87 | 28.23 | 31.90 | 0.00 | 5.26 | 7.97 | 869.84 | 97.24 | 176.96 | 300.12 | 188.15 | 107.36 |
| Std. | 4.83 | 1.17 | 4.94 | 0.00 | 0.81 | 1.73 | 155.43 | 38.98 | 61.23 | 87.42 | 112.68 | 155.13 |
| QH1 | Minimum | 45.44 | 26.04 | 9.94 | 0.00 | 3.29 | 4.58 | 923.06 | 139.28 | 106.01 | 234.49 | 71.04 | 119.27 |
| Maximum | 57.32 | 32.74 | 26.17 | 0.00 | 4.38 | 9.83 | 1382.46 | 264.7 | 226.65 | 511.91 | 363.57 | 234.55 |
| Average | 51.49 | 27.59 | 19.49 | 0.00 | 4.58 | 7.97 | 1157.28 | 154.96 | 196.98 | 368.05 | 266.17 | 162.42 |
| Std. | 2.84 | 1.49 | 3.82 | 0.00 | 0.30 | 1.28 | 109.45 | 46.77 | 31.2 | 78.99 | 81.4 | 102.42 |
| QH2 | Minimum | 37.24 | 25.41 | 24.54 | 0.00 | 3.99 | 6.4 | 934.42 | 117.66 | 136.09 | 248.97 | 32.4 | 122.64 |
| Maximum | 50.05 | 27.80 | 34.96 | 0.00 | 5.59 | 12.41 | 1592.52 | 180.92 | 312.04 | 602.2 | 452.9 | 283.46 |
| Average | 45.07 | 26.70 | 28.23 | 0.00 | 5.43 | 9.11 | 1289.6 | 180.46 | 236.4 | 417.42 | 279.17 | 176.15 |
| Std. | 3.08 | 0.70 | 2.72 | 0.00 | 0.38 | 1.73 | 204.41 | 63.05 | 45.84 | 91.34 | 103.46 | 207.79 |
| QH3 | Minimum | 35.32 | 26.78 | 30.39 | 0.00 | 4.72 | 5.32 | 926.66 | 87.32 | 156.83 | 253.53 | 45.22 | 79.06 |
| Maximum | 42.75 | 28.15 | 36.64 | 0.00 | 6.02 | 8.51 | 1630.17 | 267.76 | 289.64 | 608.37 | 341.89 | 262.76 |
| Average | 39.25 | 27.48 | 33.28 | 0.00 | 6.40 | 7.47 | 1123.04 | 154.86 | 219.68 | 363.06 | 233.54 | 157.16 |
| Std. | 2.02 | 0.51 | 1.70 | 0.00 | 0.36 | 0.79 | 186.89 | 50.28 | 36.01 | 87.14 | 92.21 | 183.66 |
| AXH1 | Minimum | 40.48 | 23.90 | 26.91 | 0.00 | 4.21 | 6.11 | 749.88 | 78.04 | 117.28 | 255.91 | 74.02 | 51.57 |
| Maximum | 47.36 | 26.27 | 34.77 | 5.12 | 5.01 | 9.55 | 1090.04 | 144.93 | 248.08 | 531.62 | 214.7 | 151.3 |
| Average | 43.15 | 24.94 | 31.58 | 0.34 | 4.67 | 8.05 | 931.15 | 108.97 | 178.18 | 396.92 | 154.69 | 92.39 |
| Std. | 1.61 | 0.59 | 2.21 | 1.28 | 0.19 | 0.99 | 105.72 | 22.74 | 35.88 | 79.28 | 39.22 | 96.97 |
| AXH2 | Minimum | 37.80 | 21.57 | 32.36 | 3.30 | 4.39 | 5.17 | 616.58 | 61.74 | 90.42 | 251.65 | 91.1 | 54.35 |
| Maximum | 45.67 | 23.67 | 37.24 | 4.28 | 5.56 | 9.50 | 1105.08 | 217.22 | 236.4 | 610.85 | 191.68 | 167.06 |
| Average | 41.28 | 22.78 | 34.82 | 1.12 | 4.97 | 7.91 | 914.11 | 125.43 | 169.94 | 386.58 | 134.49 | 97.68 |
| Std. | 2.54 | 0.72 | 1.55 | 1.72 | 0.37 | 1.76 | 179.15 | 51.35 | 53.4 | 105.4 | 31.73 | 173.73 |
| AXH3 | Minimum | 30.56 | 21.30 | 39.34 | 5.42 | 5.85 | 4.53 | 864.84 | 61.69 | 139.39 | 251.45 | 63.79 | 45.67 |
| Maximum | 36.63 | 24.59 | 44.74 | 7.20 | 8.74 | 7.83 | 1532.88 | 299.71 | 414.04 | 540.25 | 275.86 | 220.42 |
| Average | 34.65 | 23.09 | 41.04 | 1.22 | 6.58 | 5.54 | 1031.04 | 130.35 | 248.02 | 396.46 | 143.16 | 113.06 |
| Std. | 1.71 | 0.98 | 1.52 | 2.47 | 0.76 | 0.81 | 172.76 | 61.43 | 76.15 | 79.13 | 50.47 | 153.37 |

Note: Std. means standard deviation.
